# Supplementary material for: TNF-induced necroptosis in L929 cells is tightly regulated by multiple TNFR1 complex I and II members
Source: PubMed Central journal article supplement — Cell Death Dis. 2011 Nov 17;2(11):e230–. doi: 10.1038/cddis.2011.111 (PMC3223695; doi:10.1038/cddis.2011.111), 2011-11-17

Supplementary Figure 1: TNF-induced I $\kappa$ B $\alpha$  degradation upon knockdown of HOIL-1, HOIP, NEMO, FADD, TRADD or A20

a

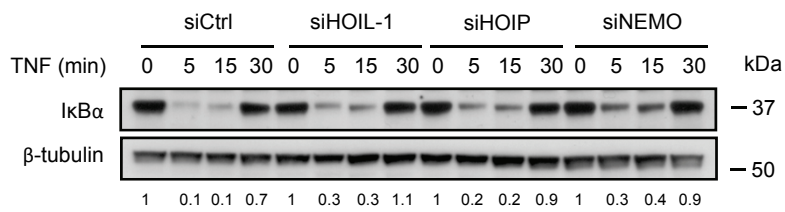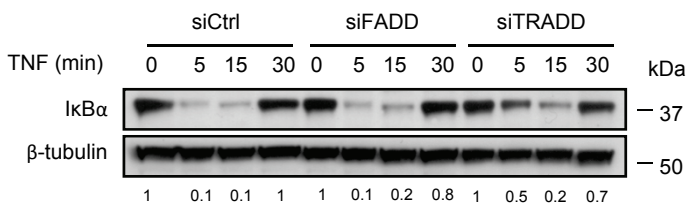

b

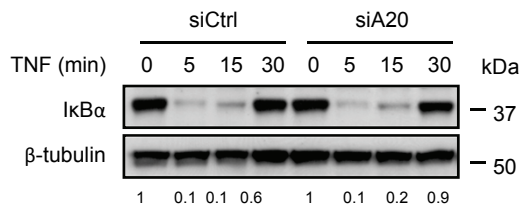

Supplement: cddis2011111x1.pdf [file cddis2011111x1.pdf]
