# Supplementary figures and images for: TNF-induced necroptosis in L929 cells is tightly regulated by multiple TNFR1 complex I and II members
Source: PubMed Central journal article supplement — Cell Death Dis. 2011 Nov 17;2(11):e230–. doi: 10.1038/cddis.2011.111 (PMC3223695; doi:10.1038/cddis.2011.111), 2011-11-17

Supplementary Figure 3: Knockdown of caspase-8 promotes TNF-induced necroptosis

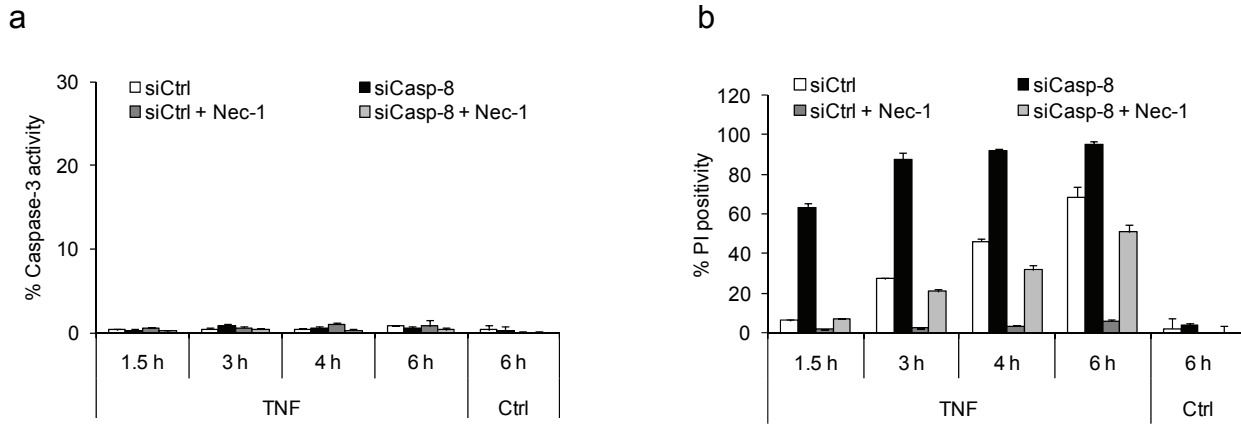

Supplement: cddis2011111x3.pdf [file cddis2011111x3.pdf]

Supplementary Figure 4: Knockdown of c-FLIP enhances TNF-induced necroptosis

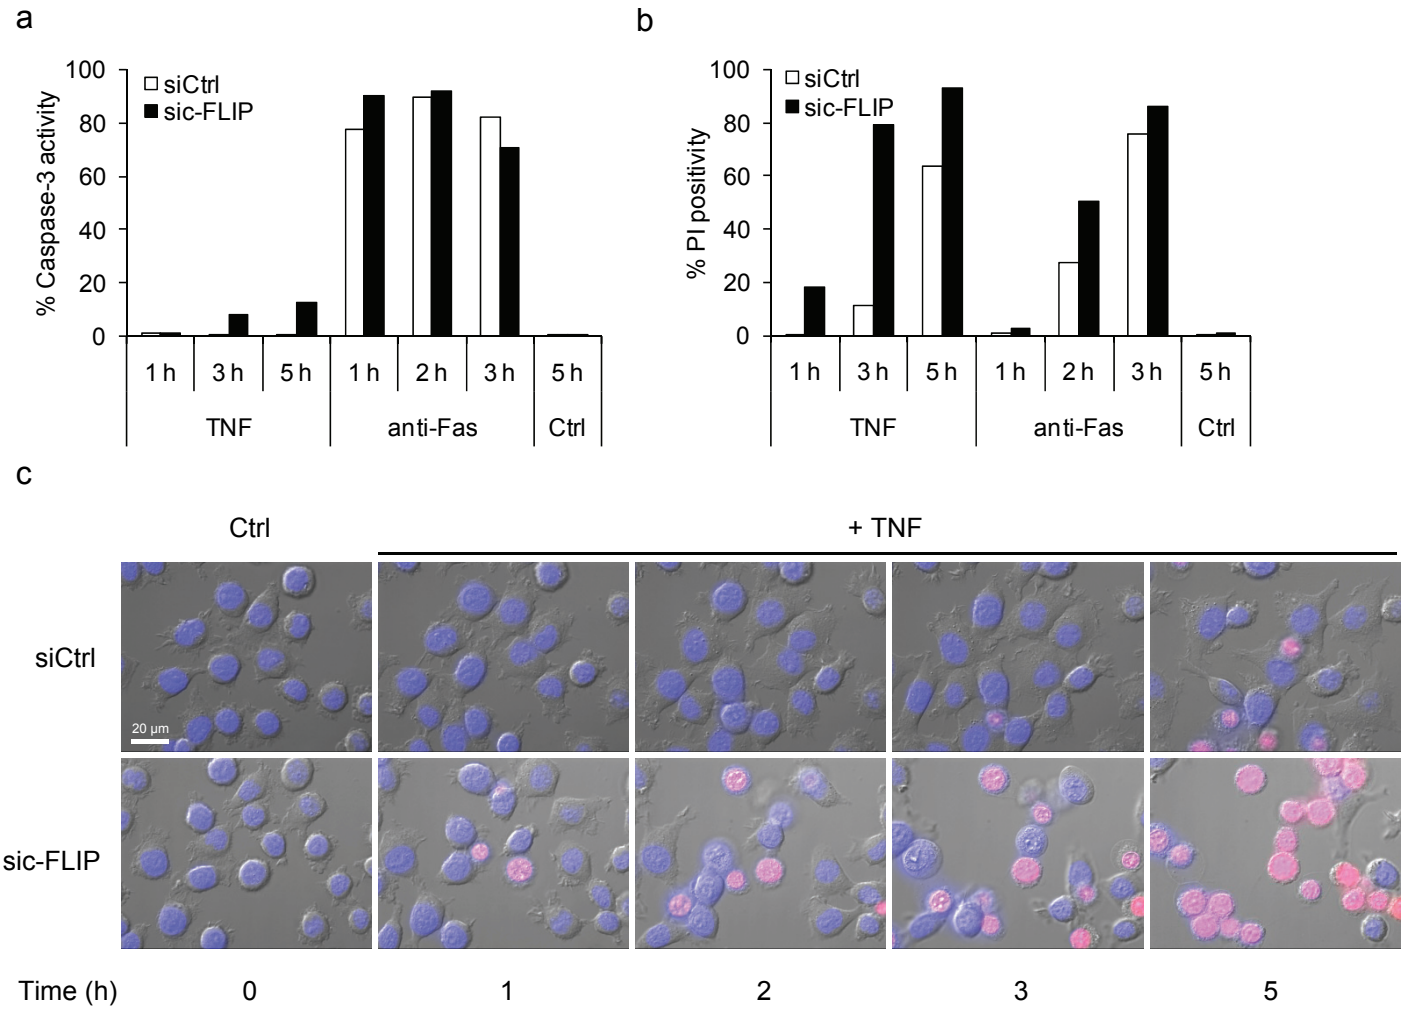

Supplement: cddis2011111x4.pdf [file cddis2011111x4.pdf]

Supplementary Figure 5: Knockdown of CYLD decreases H<sub>2</sub>O<sub>2</sub>-induced necrosis

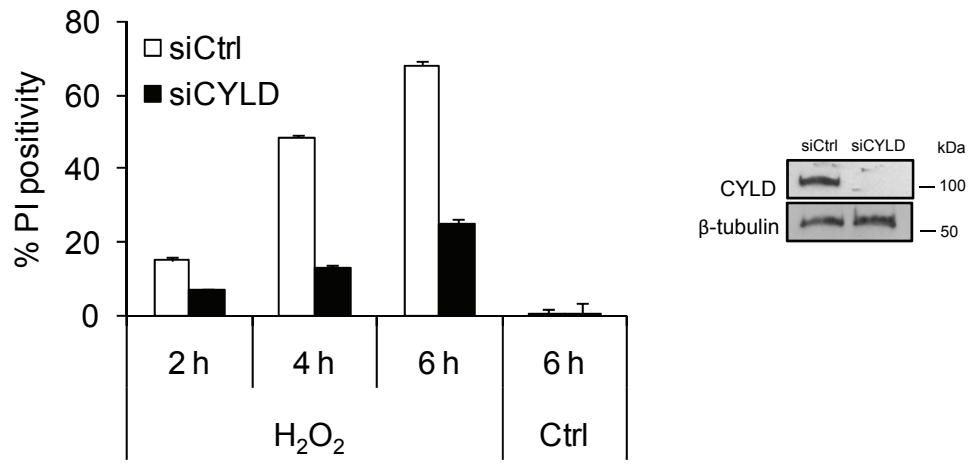

Supplement: cddis2011111x5.pdf [file cddis2011111x5.pdf]
